# Supplementary material for: Predicting the clinical management of skin lesions using deep learning
Source: PubMed Central journal article supplement (PMC8032721; doi:10.1038/s41598-021-87064-7), 2021-04-08
Supplement: 41598_2021_87064_MOESM1_ESM.pdf [file 41598_2021_87064_MOESM1_ESM.pdf]

# Predicting the Clinical Management of Skin Lesions using Deep Learning

Kumar Abhishek      Jeremy Kawahara      Ghassan Hamarneh

School of Computing Science, Simon Fraser University, Canada  
{kabhishe, jkawahar, hamarneh}@sfu.ca

## **Supplementary Information**

### **Dataset breakdown**

In Supplementary Table 1, we present a detailed breakdown of the seven-point criteria evaluation dataset along with the diagnosis-wise groupings used to train the models, and in Supplementary Table 2, we present a breakdown of the patient metadata, namely the sex of the patient, and the elevation and the location of the lesion.

Supplementary Table 1: Breakdown of the seven-point criteria evaluation dataset by management and diagnosis labels and the training-validation-testing splits used to train the models.

| Diagnosis                       | Count | Abbreviation | Diagnosis | Management |     |      |
|---------------------------------|-------|--------------|-----------|------------|-----|------|
|                                 |       |              | Total     | CLNC       | EXC | NONE |
| basal cell carcinoma            | 42    | BCC          | 42        | 0          | 42  | 0    |
| blue nevus                      | 28    |              |           |            |     |      |
| clark nevus                     | 399   |              |           |            |     |      |
| combined nevus                  | 13    |              |           |            |     |      |
| congenital nevus                | 17    | NEV          | 575       | 268        | 278 | 29   |
| dermal nevus                    | 33    |              |           |            |     |      |
| recurrent nevus                 | 6     |              |           |            |     |      |
| reed or spitz nevus             | 79    |              |           |            |     |      |
| melanoma                        | 1     |              |           |            |     |      |
| melanoma (in situ)              | 64    |              |           |            |     |      |
| melanoma<br>(less than 0.76 mm) | 102   | MEL          | 252       | 0          | 252 | 0    |
| melanoma<br>(0.76 to 1.5 mm)    | 53    |              |           |            |     |      |
| melanoma<br>(more than 1.5 mm)  | 28    |              |           |            |     |      |
| melanoma metastasis             | 4     |              |           |            |     |      |
| dermatofibroma                  | 20    |              |           |            |     |      |
| lentigo                         | 24    |              |           |            |     |      |
| melanosis                       | 16    | MISC         | 97        | 24         | 23  | 50   |
| miscellaneous                   | 8     |              |           |            |     |      |
| vascular lesion                 | 29    |              |           |            |     |      |
| seborrheic keratosis            | 45    | SK           | 45        | 4          | 10  | 31   |
| <b>Management Total</b>         | -     | -            | -         | 296        | 605 | 110  |

Supplementary Table 2: Breakdown of the patient metadata of the seven-point criteria evaluation dataset.

| <b>Label</b>     | <b>Count</b> | <b>Label</b>    | <b>Count</b> |
|------------------|--------------|-----------------|--------------|
| <i>Sex</i>       |              | <i>Location</i> |              |
| Female           | 522          | Abdomen         | 125          |
| Male             | 489          | Acral           | 62           |
| <i>Elevation</i> |              | Back            | 281          |
| Flat             | 448          | Buttocks        | 21           |
| Nodular          | 123          | Chest           | 100          |
| Palpable         | 440          | Genital areas   | 8            |
|                  |              | Head-neck       | 92           |
|                  |              | Lower limbs     | 200          |
|                  |              | Upper limbs     | 122          |
